# Supplementary material for: Delay-dependent contributions of medial temporal lobe regions to episodic memory retrieval
Source: eLife journal article supplement (doi:10.7554/elife.05025), 2015-01-13
Supplement: supp [file elife-05025-supp-v1.zip]

Ant. HF

Post. HF

PRC

PHC

\*

†

†

Similarity

0.16

0.12

0.08

0.04

0.16

0.12

0.08

0.04

immediate

delayed

immediate

delayed

immediate

delayed

immediate

delayed

—●— same-room —●— diff-room

L

R
