# Supplementary figures and images for: Delay-dependent contributions of medial temporal lobe regions to episodic memory retrieval
Source: eLife journal article supplement (doi:10.7554/elife.05025), 2015-01-13

L Ant. HF

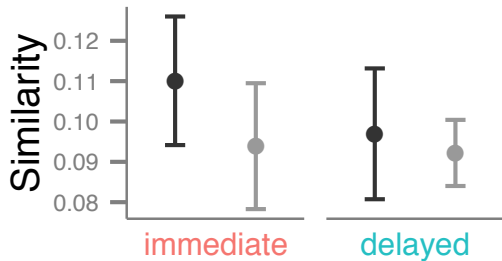

L PRC

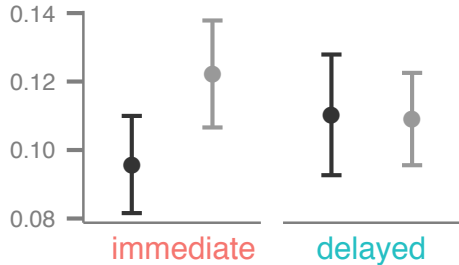

—●— same-room —●— diff-room

Supplement: supp [file elife-05025-supp-v1.zip]

Rec - Fam contrast value

Ant. HF

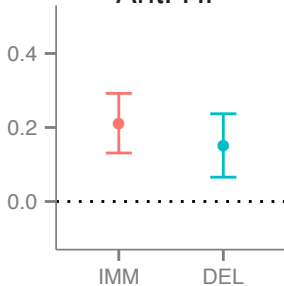

Post. HF

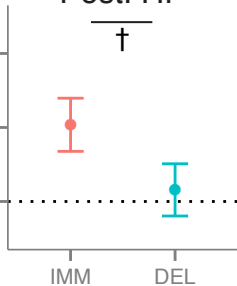

PRC

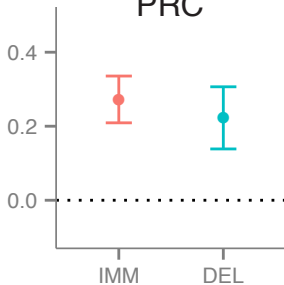

PHC

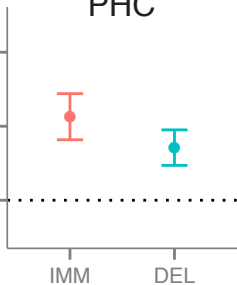

Supplement: supp [file elife-05025-supp-v1.zip]

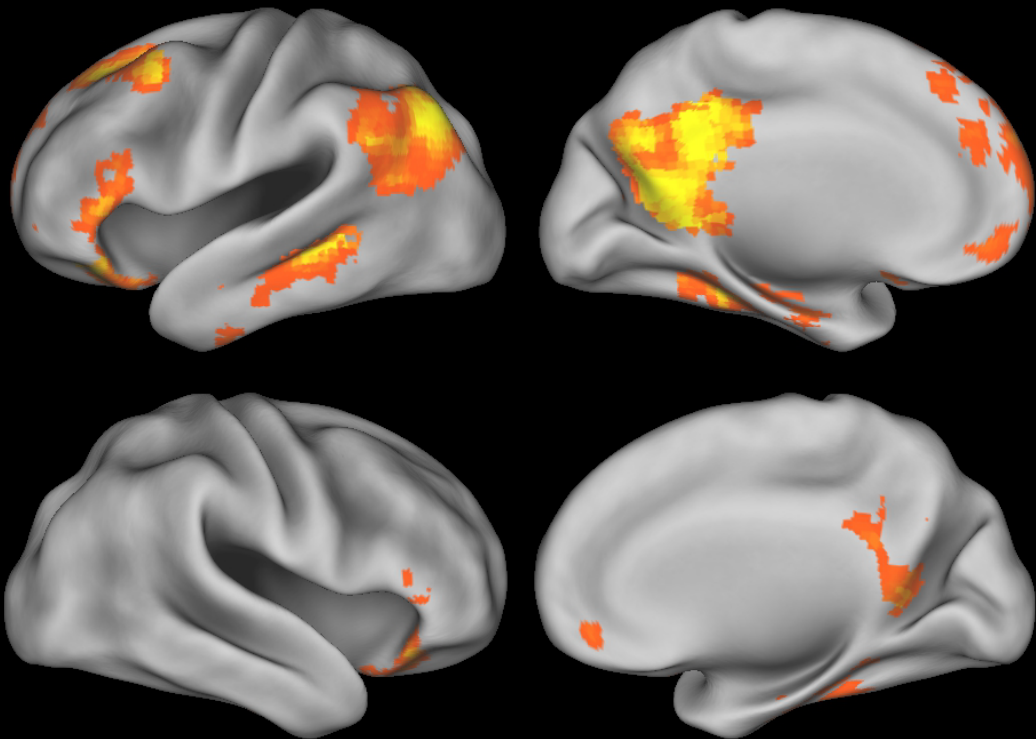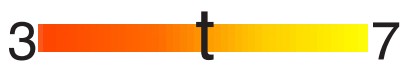

Supplement: supp [file elife-05025-supp-v1.zip]

Rec - Fam contrast value

Ant. HF

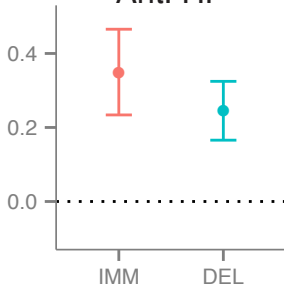

Post. HF

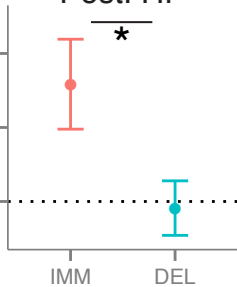

PRC

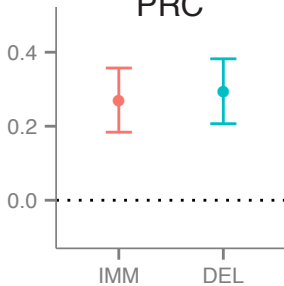

PHC

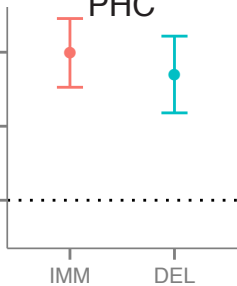

Supplement: supp [file elife-05025-supp-v1.zip]

**A**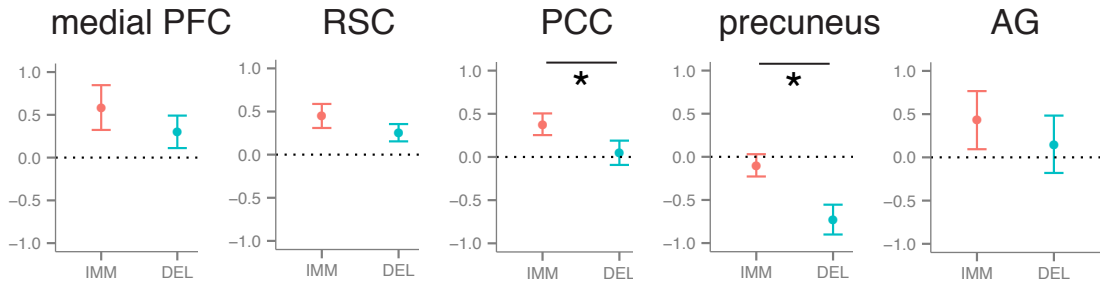**B**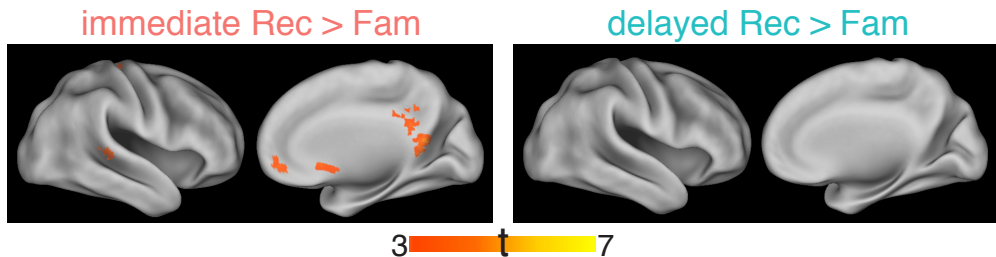

Supplement: supp [file elife-05025-supp-v1.zip]

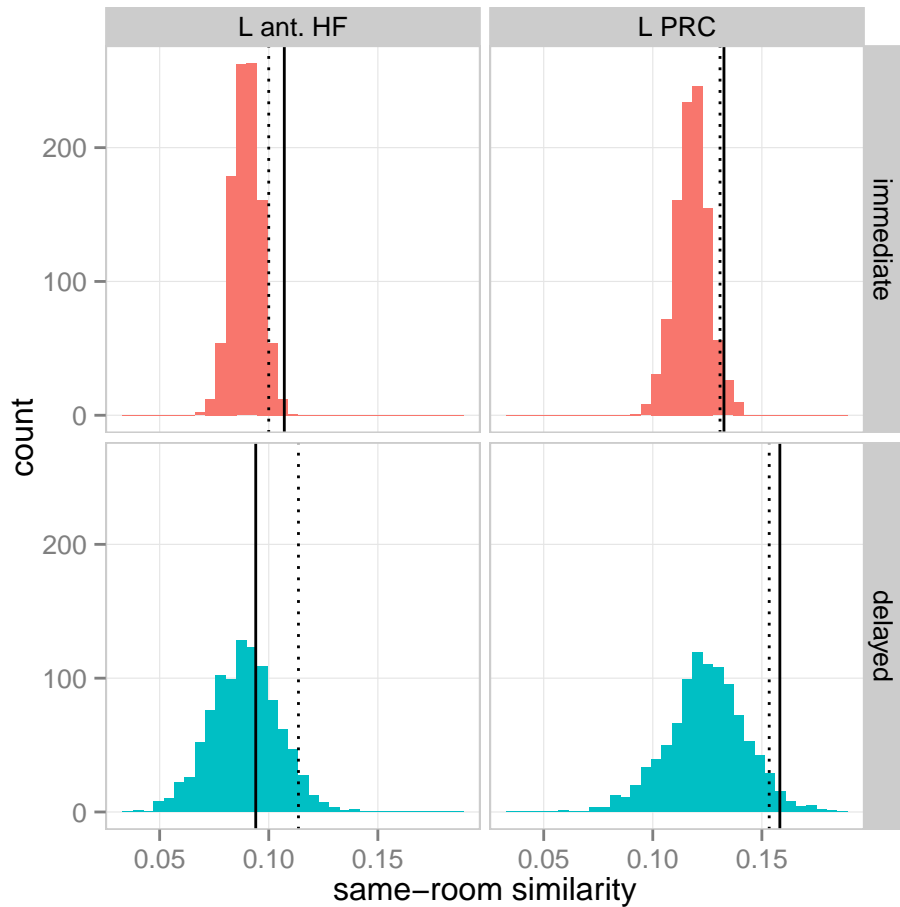

Supplement: supp [file elife-05025-supp-v1.zip]
